# Supplementary material
Source: PubMed Central journal article supplement (PMC8757568)

## Supplementary Appendix

Supplement to: Muhsen K, Maimon N, Mizrahi A, et al. Effects of BNT162b2 Covid-19 vaccine booster in long-term care facilities in Israel. *N Engl J Med*. DOI: 10.1056/NEJMc2117385

This appendix has been provided by the authors to give readers additional information about the work.

## Table of Contents

|                                 |   |
|---------------------------------|---|
| <b>Supplementary Table 1</b>    | 2 |
| <b>Supplementary Table 2</b>    | 3 |
| <b>Supplementary Table 3</b>    | 4 |
| <b>Supplementary figure 1A:</b> | 5 |
| <b>Supplementary figure 1B</b>  | 6 |
| <b>Supplementary figure 1C</b>  | 7 |

**Supplementary Table 1: Demographic characteristics of LTCF residents aged age 60 years or older**

|                                                                            | <b>Ever infected residents <sup>a</sup></b> | <b>Uninfected residents</b> | <b>Overall</b> |
|----------------------------------------------------------------------------|---------------------------------------------|-----------------------------|----------------|
| <b>Total</b>                                                               | N=2442                                      | N=39,181                    | N=41,623       |
| <b>Sex</b>                                                                 |                                             |                             |                |
| Female                                                                     | 1701 (69.7%)                                | 27,698 (70.7%)              | 29,399 (70.6%) |
| Males                                                                      | 740 (30.3%)                                 | 11,405 (29.1%)              | 12,145 (29.2%) |
| Missing                                                                    | 1 (0.0%)                                    | 78 (0.2%)                   | 79 (0.2%)      |
| <b>Age groups, years</b>                                                   |                                             |                             |                |
| 60 to 69                                                                   | 262 (10.7%)                                 | 4260 (10.9%)                | 4522 (10.9%)   |
| 70 to 79                                                                   | 553 (22.6%)                                 | 10,012 (25.6%)              | 10,565 (25.4%) |
| 80 to 89                                                                   | 1049 (43.0%)                                | 16,688 (42.6%)              | 17,737 (42.6%) |
| 90+                                                                        | 496 (20.3%)                                 | 6860 (17.5%)                | 7356 (17.7%)   |
| Missing                                                                    | 82 (3.4%)                                   | 1361 (3.5%)                 | 1443 (3.5%)    |
| <b>Age, years</b>                                                          |                                             |                             |                |
| Mean (SD)                                                                  | 82.4 (9.3)                                  | 81.8 (9.1)                  | 81.8 (9.1)     |
| MEDIAN [IQR]                                                               | 84.0 [13.0]                                 | 83.0 [13.0]                 | 83.0 [14.0]    |
| [MIN, MAX]                                                                 | [60.0, 103]                                 | [60.0, 121]                 | [60.0, 121]    |
| <b>Socioeconomic status</b>                                                |                                             |                             |                |
| Low                                                                        | 371 (15.2%)                                 | 5313 (13.6%)                | 5684 (13.7%)   |
| Medium                                                                     | 714 (29.2%)                                 | 11,155 (28.5%)              | 11,869 (28.5%) |
| High                                                                       | 864 (35.4%)                                 | 14,487 (37.0%)              | 15,351 (36.9%) |
| Missing                                                                    | 493 (20.2%)                                 | 8226 (21.0%)                | 8719 (20.9%)   |
| <b>Population group</b>                                                    |                                             |                             |                |
| Arabs                                                                      | 87 (3.6%)                                   | 713 (1.8%)                  | 800 (1.9%)     |
| General Jewish population                                                  | 2112 (86.5%)                                | 35,848 (91.5%)              | 37,960 (91.2%) |
| Ultraorthodox Jewish population                                            | 135 (5.5%)                                  | 1367 (3.5%)                 | 1502 (3.6%)    |
| Missing                                                                    | 108 (4.4%)                                  | 1253 (3.2%)                 | 1361 (3.3%)    |
| <b>Institution type</b>                                                    |                                             |                             |                |
| Geriatric institutions                                                     | 1140 (46.7%)                                | 11,104 (28.3%)              | 12,244 (29.4%) |
| Other geriatrics                                                           | 556 (22.8%)                                 | 14,631 (37.3%)              | 15,187 (36.5%) |
| Social services- mental debilitation institutions                          | 171 (7.0%)                                  | 1819 (4.6%)                 | 1990 (4.8%)    |
| Social services- assisted living houses (functionally independent persons) | 526 (21.5%)                                 | 10,647 (27.2%)              | 11,173 (26.8%) |
| Other                                                                      | 49 (2.0%)                                   | 980 (2.5%)                  | 1029 (2.5%)    |

Data presented are number and percentages in parenthesis unless otherwise specified

IQR: Interquartile range, LTCFs: long-term care facilities, Max: maximum, Min: minimum, SD standard deviation.

Residents who had ever having a positive SARS-CoV-2 RT-PCR test result were classified as infected residents, and those who did not were classified as uninfected residents

**Supplementary Table 2: Incidence rate ratio of RT-PCR confirmed SARS-CoV-2 infection among LTCF residents and the general population before and after the BNT162b2 booster introduction in Israel (calendar weeks 26-36, June 27-September 11, 2021)**

|                  | Residents of long-term care facilities<br>age 60 years or older |                                  |                      | General population age 60 years or<br>older |                                  |                      | General population age 20-59 years |                                  |                      | General population age less than 20<br>years |                                  |                      |
|------------------|-----------------------------------------------------------------|----------------------------------|----------------------|---------------------------------------------|----------------------------------|----------------------|------------------------------------|----------------------------------|----------------------|----------------------------------------------|----------------------------------|----------------------|
|                  | Pre-BNT162b2 boost period                                       |                                  |                      | Pre-BNT162b2 boost period                   |                                  |                      | Pre-BNT162b2 boost period          |                                  |                      | Pre-BNT162b2 boost period                    |                                  |                      |
| Calendar<br>week | Number<br>of cases                                              | Incidence rate<br>ratio (95% CI) | P value <sup>a</sup> | Number<br>of cases                          | Incidence rate<br>ratio (95% CI) | P value <sup>a</sup> | Number<br>of cases                 | Incidence rate<br>ratio (95% CI) | P value <sup>a</sup> | Number<br>of cases                           | Incidence rate<br>ratio (95% CI) | P value <sup>a</sup> |
| Week 26          | 6                                                               | 1.00 (Ref.)                      | -                    | 268                                         | 1.00 (Ref.)                      | -                    | 654                                | 1.00 (Ref.)                      | -                    | 918                                          | 1.00 (Ref.)                      | -                    |
| Week 27          | 6                                                               | 1.00 (0.32-3.10)                 | 1.00                 | 445                                         | 1.66 (1.42-1.93)                 | <0.001               | 1304                               | 1.89 (1.81-2.19)                 | <0.001               | 1,392                                        | 1.51 (1.39-1.64)                 | <0.001               |
| Week 28          | 12                                                              | 2.00 (0.75-5.32)                 | 0.29                 | 698                                         | 2.60 (2.26-2.99)                 | <0.001               | 2309                               | 3.53 (3.23-3.85)                 | <0.001               | 2,084                                        | 2.27 (2.10-2.45)                 | <0.001               |
| Week 29          | 32                                                              | 5.33 (2.23-12.75)                | 0.0003               | 1146                                        | 4.27 (3.74-4.88)                 | <0.001               | 3930                               | 6.00 (5.53-6.52)                 | <0.001               | 3,486                                        | 3.79 (3.53-4.08)                 | <0.001               |
| Week 30          | 47                                                              | 7.83 (3.34-18.32)                | <0.001               | 2194                                        | 8.18 (7.21-9.24)                 | <0.001               | 6753                               | 10.32 (9.52-11.18)               | <0.001               | 5,654                                        | 6.15 (5.74-6.60)                 | <0.001               |
|                  | BNT12b2 boost period                                            |                                  |                      | BNT162b2 boost period                       |                                  |                      | BNT162b2 boost period              |                                  |                      | BNT162b2 boost period                        |                                  |                      |
| Week 31          | 112                                                             | 1.00 (Ref.)                      | -                    | 3165                                        | 1.00 (Ref.)                      | -                    | 11,014                             | 1.00 (Ref.)                      | -                    | 9096                                         | 1.00 (Ref.)                      | -                    |
| Week 32          | 113                                                             | 1.00 (0.77-1.31)                 | 1.00                 | 4788                                        | 1.51 (1.44-1.58)                 | <0.001               | 18,852                             | 1.71 (1.67-1.75)                 | <0.001               | 14,071                                       | 1.54 (1.50-1.58)                 | <0.001               |
| Week 33          | 94                                                              | 0.84 (0.64-1.10)                 | 0.270                | 4563                                        | 1.44 (1.37-1.50)                 | <0.001               | 25,628                             | 2.32 (2.27-2.37)                 | <0.001               | 20,556                                       | 2.26 (2.20-2.31)                 | <0.001               |
| Week 34          | 60                                                              | 0.54 (0.39-0.73)                 | 0.0002               | 3618                                        | 1.14 (1.09-1.19)                 | <0.001               | 30,540                             | 2.77 (2.71-2.83)                 | <0.001               | 26,492                                       | 2.91 (2.84-2.98)                 | <0.001               |
| Week 35          | 34                                                              | 0.30 (0.20-0.44)                 | <0.001               | 2891                                        | 0.91 (0.86-0.96)                 | <0.001               | 29,799                             | 2.70 (2.64-2.76)                 | <0.001               | 32,903                                       | 3.61 (3.53-3.70)                 | <0.001               |
| Week 36          | 33                                                              | 0.29 (0.20-0.43)                 | <0.001               | 2030                                        | 0.64 (0.60-0.67)                 | <0.001               | 22803                              | 2.07 (2.02-2.11)                 | <0.001               | 29,941                                       | 3.29 (3.21-3.37)                 | <0.001               |

CI: confidence intervals, LTCF: Long-term care facilities

<sup>a</sup> Adjusted P values: Benjamini-Hochberg method for false discovery rate was used to obtain adjusted p value for multiple comparisons.

**Supplementary Table 3: Incidence rate ratio of new hospitalizations for severe COVID-19 among LTCF residents and the general population before and after the BNT162b2 booster introduction in Israel, (calendar weeks 26-36, June 27-September 11, 2021)**

|                      | Residents of long-term care facilities age 60 years or older |                               |                      | General population age 60 years or older |                               |                      | General population age less than 60 years |                               |                      |
|----------------------|--------------------------------------------------------------|-------------------------------|----------------------|------------------------------------------|-------------------------------|----------------------|-------------------------------------------|-------------------------------|----------------------|
|                      | Pre-BNT162b2 boost period                                    |                               |                      | Pre-BNT162b2 boost period                |                               |                      | Pre-BNT162b2 boost period                 |                               |                      |
| Calendar week        | Number of cases                                              | Incidence rate ratio (95% CI) | P value <sup>a</sup> | Number of cases                          | Incidence rate ratio (95% CI) | P value <sup>a</sup> | Number of cases                           | Incidence rate ratio (95% CI) | P value <sup>a</sup> |
| Week 26              | 1                                                            | 1.00 (Ref.)                   | -                    | 12                                       | 1.00 (Ref.)                   | -                    | 5                                         | 1.00 (Ref.)                   | -                    |
| Week 27 <sup>b</sup> | -                                                            | -                             | -                    | 37                                       | 3.08 (1.60-5.91)              | <0.001               | 10                                        | 2.00 (0.68-5.85)              | 0.206                |
| Week 28              | 4                                                            | 4.00 (0.47-35.78)             | 0.286                | 51                                       | 4.25 (2.26-7.97)              | <0.001               | 14                                        | 2.80 (1.00-7.77)              | 0.054                |
| Week 29              | 6                                                            | 6.00 (0.72-49.83)             | 0.155                | 72                                       | 6.00 (3.25-11.05)             | <0.001               | 31                                        | 6.20 (2.41-15.94)             | <0.001               |
| Week 30              | 14                                                           | 14.00 (1.64-106.46)           | 0.022                | 208                                      | 17.33 (9.68-31.01)            | 0.001                | 44                                        | 8.80 (3.49-22.19)             | <0.001               |
|                      | BNT162b2 boost period                                        |                               |                      | BNT162b2 boost period                    |                               |                      | BNT162b2 boost period                     |                               |                      |
| Week 31              | 24                                                           | 1.00 (Ref.)                   | -                    | 300                                      | 1.00 (Ref.)                   | -                    | 82                                        | 1.00 (Ref.)                   | -                    |
| Week 32              | 21                                                           | 0.87 (0.48-1.57)              | 0.655                | 432                                      | 1.44 (1.24-1.69)              | <0.001               | 120                                       | 1.46 (1.10-1.93)              | 0.010                |
| Week 33              | 18                                                           | 0.75 (0.40-1.38)              | 0.306                | 427                                      | 1.42 (1.22-1.65)              | <0.001               | 188                                       | 2.29 (1.76-2.97)              | <0.001               |
| Week 34              | 8                                                            | 0.33 (0.15-0.74)              | 0.018                | 447                                      | 1.49 (1.29-1.72)              | <0.001               | 212                                       | 2.58 (2.00-3.33)              | <0.001               |
| Week 35              | 4                                                            | 0.16 (0.05-0.48)              | 0.004                | 369                                      | 1.23 (1.05-1.43)              | 0.009                | 198                                       | 2.41 (1.86-3.12)              | <0.001               |
| Week 36              | 5                                                            | 0.20 (0.07-0.54)              | 0.004                | 279                                      | 0.93 (0.79-1.09)              | 0.383                | 193                                       | 2.35 (1.81-3.04)              | <0.001               |

LTCF: Long-term care facilities

<sup>a</sup> Adjusted P values: Benjamini-Hochberg method for false discovery rate was used to obtain adjusted p value for multiple comparisons.

<sup>b</sup> No new hospitalizations for severe COVID-19 cases occurred at week 27 among residents of LTCFs

**Supplementary figure 1A:** Weekly incidence rates and 95% confidence intervals (per1000 ) of RT-PCR confirmed SARS-CoV-2 infection by study group, calendar weeks 22-36, 2021, Israel

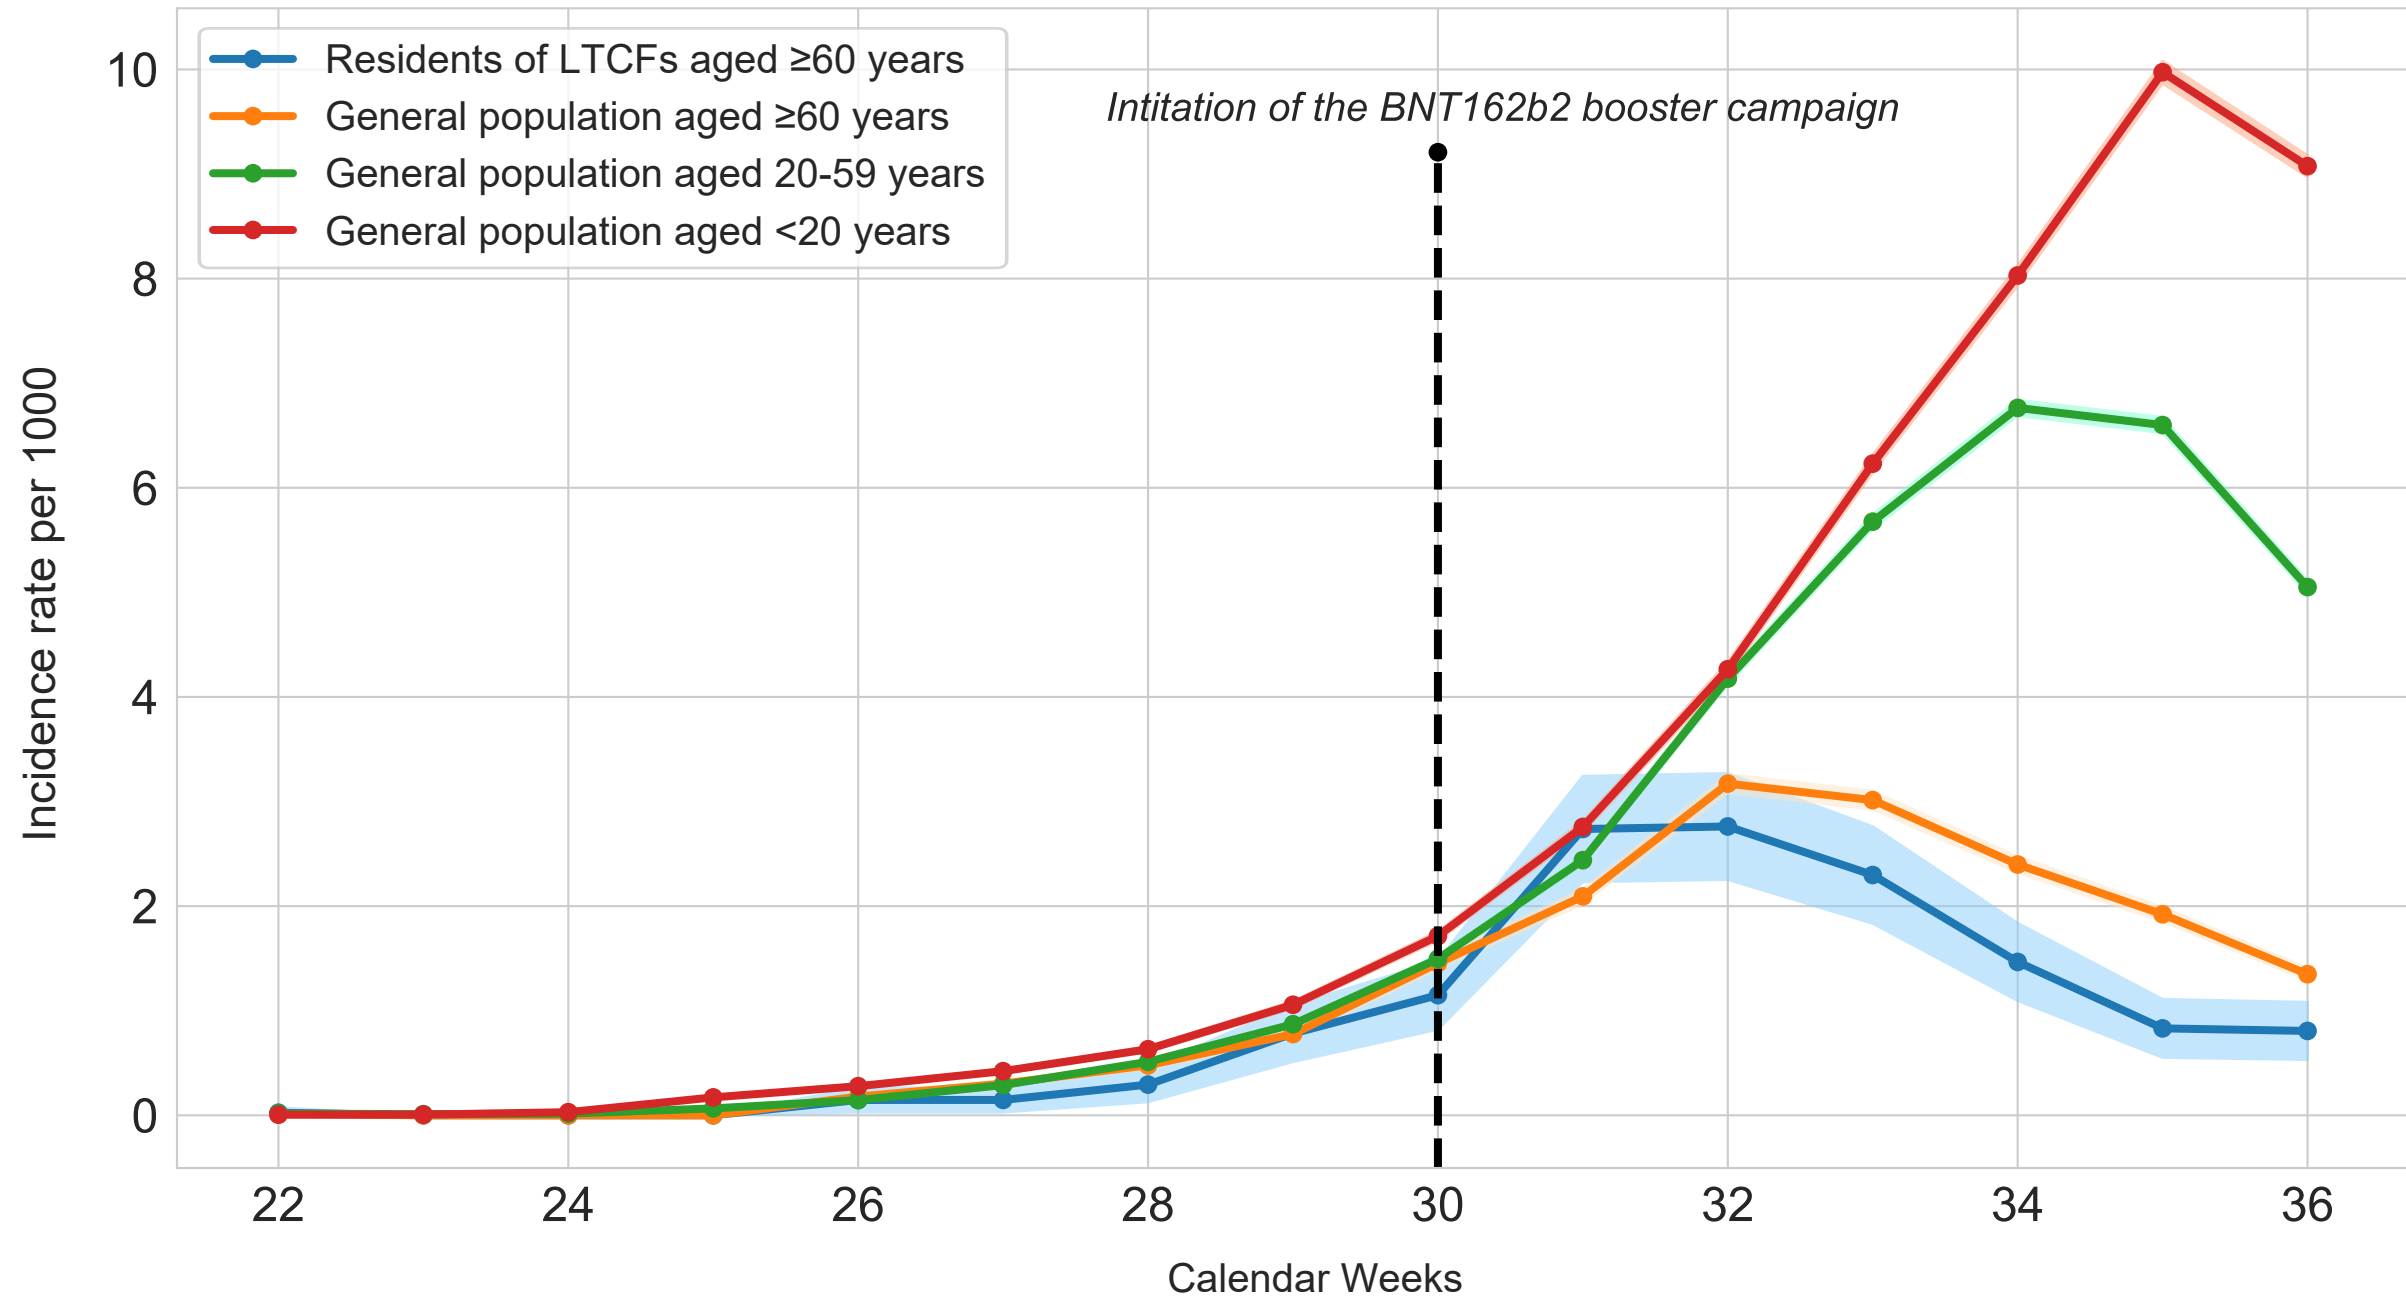

Supplementary figure 1B: Weekly incidence rates and 95% confidence intervals of hospitalizations for severe COVID-19 by study group, calendar weeks 22-36, 2021, Israel

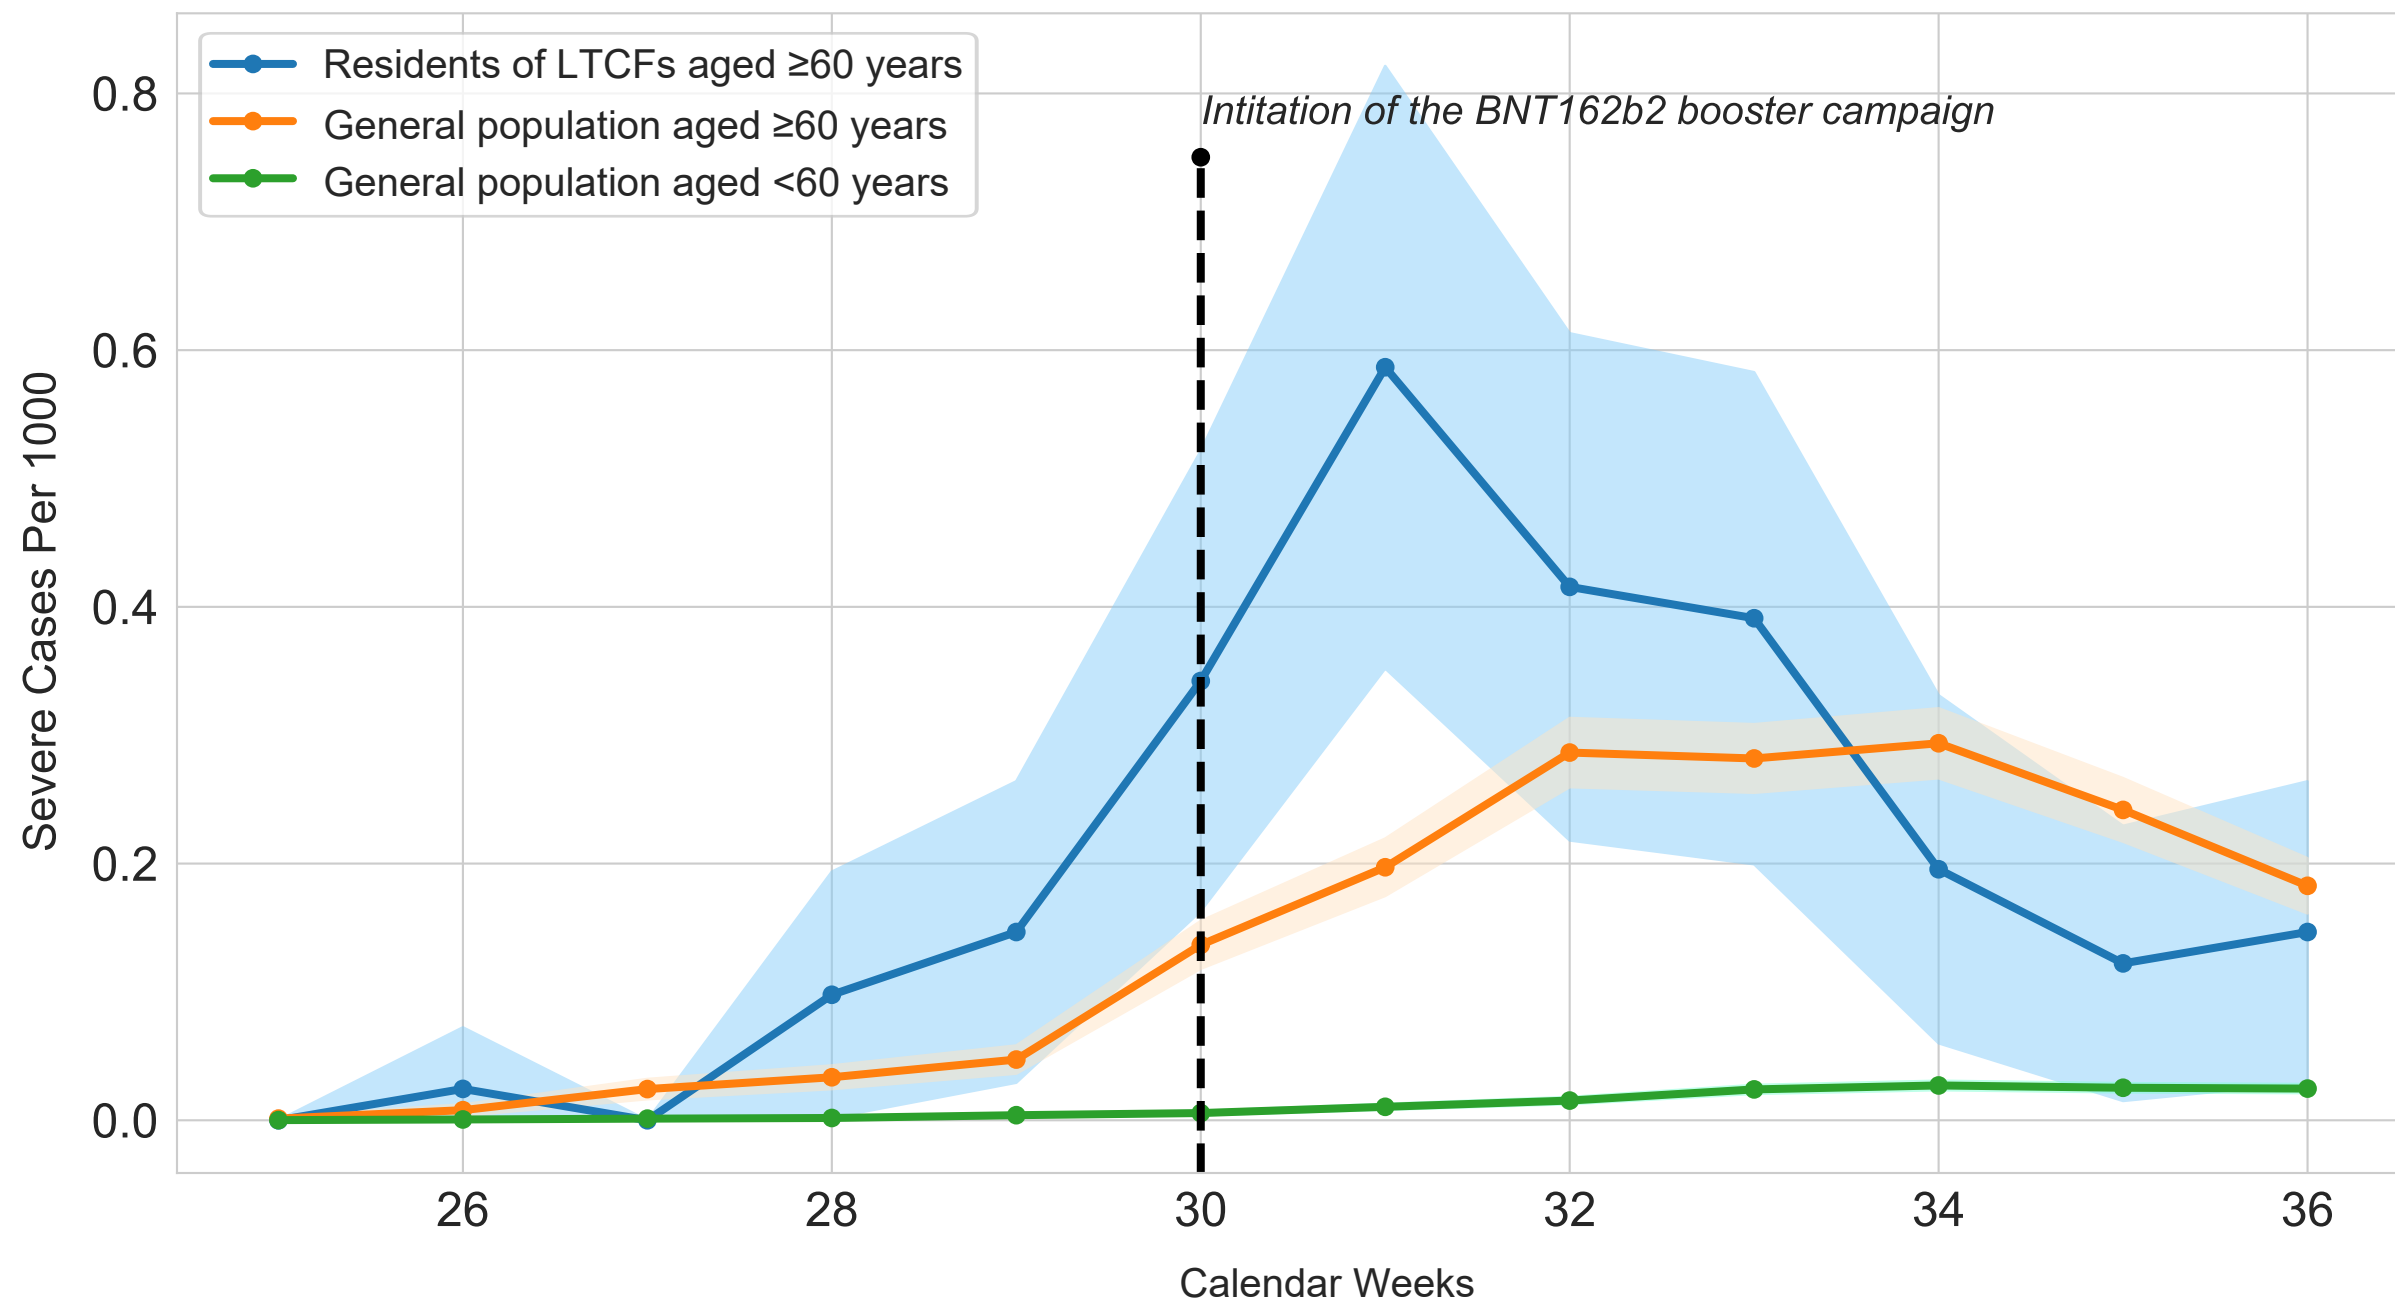

Supplementary figure 1C: Weekly COVID-19-related mortality rates and 95% confidence intervals by study group, calendar weeks 22-36, 2021, Israel

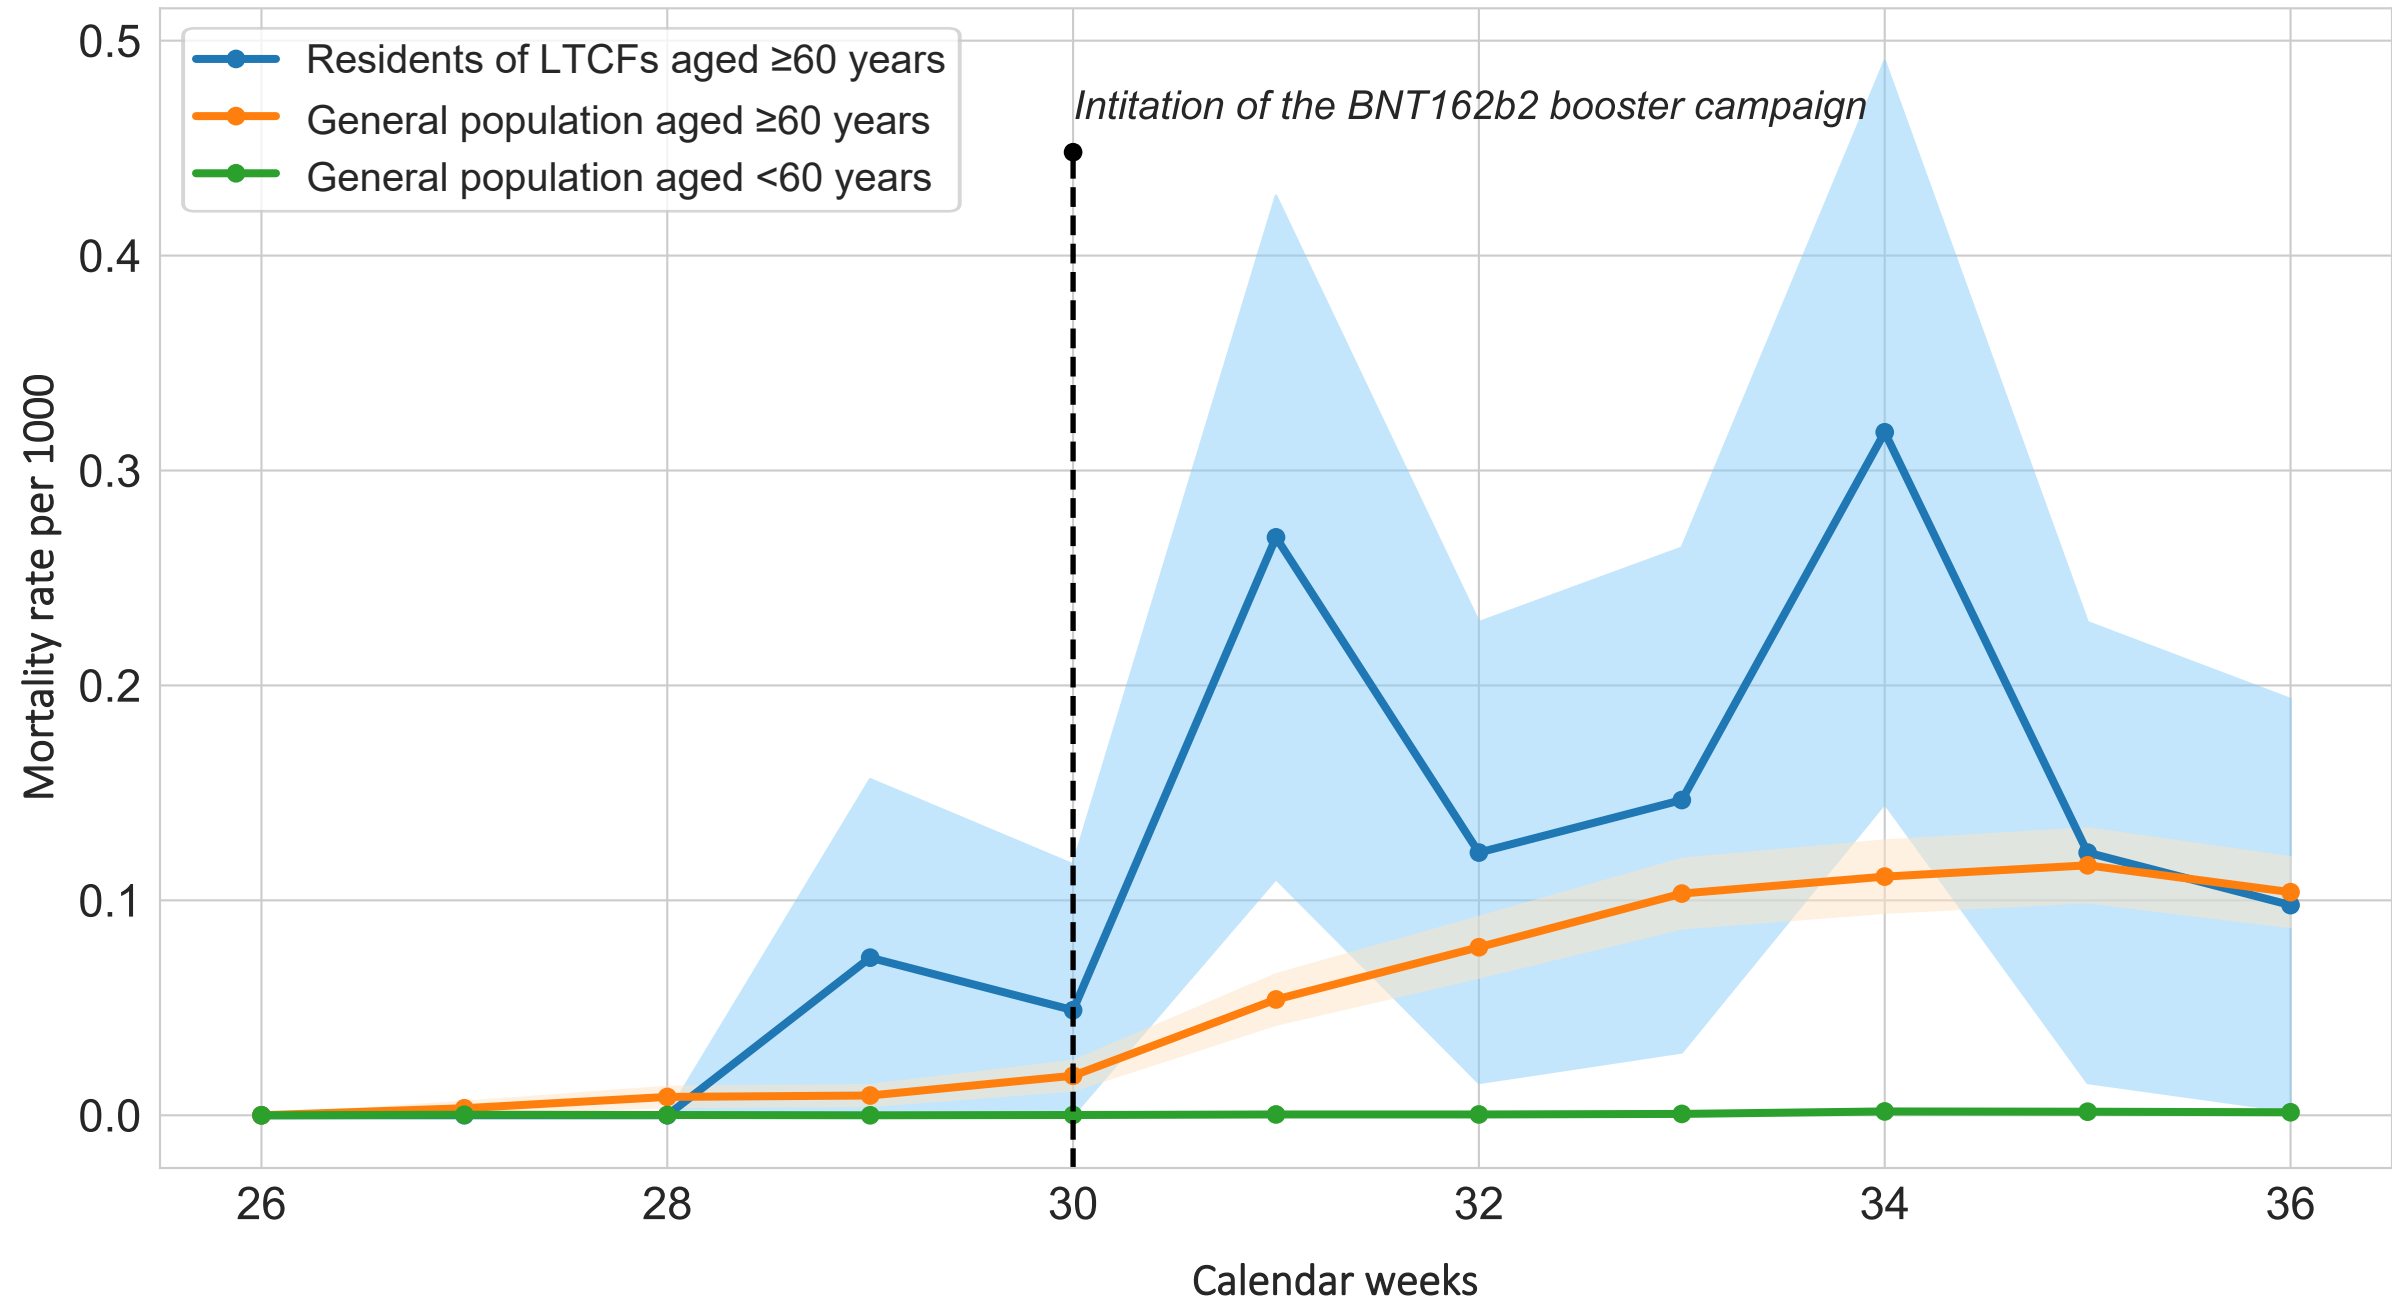

Supplement: NEJMc2117385_appendix.pdf [file NEJMc2117385_appendix.pdf]
