# Supplementary material
Source: PubMed Central journal article supplement (PMC8757568)
Supplement: NEJMc2117385_disclosures.pdf [file NEJMc2117385_disclosures.pdf]

**Disclosure Purpose:** 21-17385

**Summary of Interests**

I do not have any interests to disclose at this time.

**Additional Questions:**

- 1. **Are there other relationships or activities that readers could perceive to have influenced, or that give the appearance of potentially influencing, what you wrote in the submitted work?**  
No.
- 2. **What is the manuscript title?**  
BNT162b2 COVID-19 Vaccine Booster Effects in Long-Term Care Facilities
- 3. **Are you the corresponding author?**  
No.

**Certification**

I certify that the information provided in this disclosure is complete and accurate.

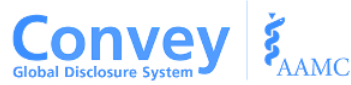

**Disclosure Purpose:** 21-17385

Summary of Interests

I do not have any interests to disclose at this time.

Additional Questions:

- 1. **Are there other relationships or activities that readers could perceive to have influenced, or that give the appearance of potentially influencing, what you wrote in the submitted work?**  
No.
- 2. **What is the manuscript title?**  
BNT162b2 COVID-19 Vaccine Booster Effects in Long-Term Care Facilities
- 3. **Are you the corresponding author?**  
No.

Certification

I certify that the information provided in this disclosure is complete and accurate.

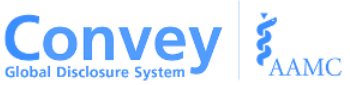

Disclosure Purpose: 21-17385

Summary of Interests

**Company or Organization**

| Entity                                                        | Type       | Interest Held By                                                       |
|---------------------------------------------------------------|------------|------------------------------------------------------------------------|
| <a href="#">Merck Sharp and Dohme</a>                         | Consultant | Self                                                                   |
| <i>Category:</i> Consultant<br><i>Additional Information:</i> |            | <i>Description:</i> Scientific consultant; Advisory board; speaker     |
| <a href="#">Pfizer</a>                                        | Consultant | Self                                                                   |
| <i>Category:</i> Consultant<br><i>Additional Information:</i> |            | <i>Description:</i> Scientific consultant; advisory committee; speaker |
| <a href="#">SANOFI PASTEUR INC.</a>                           | Other      | Self                                                                   |
| <i>Category:</i> Other<br><i>Additional Information:</i>      |            | <i>Description:</i> Speaker                                            |

Additional Questions:

- Are there other relationships or activities that readers could perceive to have influenced, or that give the appearance of potentially influencing, what you wrote in the submitted work?**  
No.
- What is the manuscript title?**  
BNT162b2 COVID-19 Vaccine Booster Effects in Long-Term Care Facilities
- Are you the corresponding author?**  
No.

Certification

I certify that the information provided in this disclosure is complete and accurate.

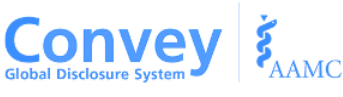

**Disclosure Purpose:** 21-17385

**Summary of Interests**

I do not have any interests to disclose at this time.

**Additional Questions:**

- 1. **Are there other relationships or activities that readers could perceive to have influenced, or that give the appearance of potentially influencing, what you wrote in the submitted work?**  
No.
- 2. **What is the manuscript title?**  
BNT162b2 COVID-19 Vaccine Booster Effects in Long-Term Care Facilities
- 3. **Are you the corresponding author?**  
No.

**Certification**

I certify that the information provided in this disclosure is complete and accurate.



**Disclosure Purpose:** 21-17385

**Summary of Interests**

I do not have any interests to disclose at this time.

**Additional Questions:**

- Are there other relationships or activities that readers could perceive to have influenced, or that give the appearance of potentially influencing, what you wrote in the submitted work?**  
No.
- What is the manuscript title?**  
BNT162b2 COVID-19 Vaccine Booster Effects in Long-Term Care Facilities
- Are you the corresponding author?**  
No.

**Certification**

I certify that the information provided in this disclosure is complete and accurate.

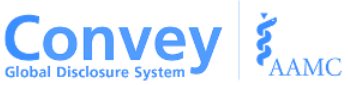

**Disclosure Purpose:** 21-17385

**Summary of Interests**

I do not have any interests to disclose at this time.

**Additional Questions:**

- 1. **Are there other relationships or activities that readers could perceive to have influenced, or that give the appearance of potentially influencing, what you wrote in the submitted work?**  
No.
- 2. **What is the manuscript title?**  
Re: BNT162b2 COVID-19 Vaccine Booster Effects in Long-Term Care Facilities
- 3. **Are you the corresponding author?**  
No.

**Certification**

I certify that the information provided in this disclosure is complete and accurate.



**Disclosure Purpose:** 21-17385

**Summary of Interests**

I do not have any interests to disclose at this time.

**Additional Questions:**

- Are there other relationships or activities that readers could perceive to have influenced, or that give the appearance of potentially influencing, what you wrote in the submitted work?**  
No.
- What is the manuscript title?**  
BNT162b2 COVID-19 Vaccine Booster Effects in Long-Term Care Facilities
- Are you the corresponding author?**  
No.

**Certification**

I certify that the information provided in this disclosure is complete and accurate.

**Disclosure Purpose:** 21-17385

### Summary of Interests

I do not have any interests to disclose at this time.

### Additional Questions:

1. **Are there other relationships or activities that readers could perceive to have influenced, or that give the appearance of potentially influencing, what you wrote in the submitted work?**

No.

2. **What is the manuscript title?**

BNT162b2 COVID-19 Vaccine Booster Effects in Long-Term Care Facilities

3. **Are you the corresponding author?**

Yes.

a. **Please list the other authors' names here.**

Nimrod Maimon, Ami Mizrahi, Baruch Varticovschi, Omri Bodenheimer, Udi Gelbshtein, Itamar Grotto, Dani Cohen, Ron Dagan

### Certification

I certify that the information provided in this disclosure is complete and accurate.



**Disclosure Purpose:** 21-17385

### Summary of Interests

I do not have any interests to disclose at this time.

### Additional Questions:

- Are there other relationships or activities that readers could perceive to have influenced, or that give the appearance of potentially influencing, what you wrote in the submitted work?**  
No.
- What is the manuscript title?**  
BNT162b2 COVID-19 Vaccine Booster Effects in Long-Term Care Facilities
- Are you the corresponding author?**  
No.

### Certification

I certify that the information provided in this disclosure is complete and accurate.
